# Supplementary material for: Noninvasive urinary protein signatures associated with colorectal cancer diagnosis and metastasis
Source: Research Square preprint supplement (doi:10.21203/rs.3.rs-124929/v1), 2020-12-29
Supplement: Supplementary file 1 [file a4ee96e855f39a43f78c2af3.xls]

## Sheet: A
Sample ID	group	ATPA_HUMAN_AVDSLVPIGR	HS90A_HUMAN_APFDLFENR	HS90A_HUMAN_GVVDSEDLPLNISR	PRDX1_HUMAN_ADEGISFR	F10A1_HUMAN_VAAIEALNDGELQK	PROZ_HUMAN_RAPDLQDLPWQVK	PROZ_HUMAN_DFAEHLLIPR	CBR1_HUMAN_TNFFGTR	CBR1_HUMAN_DVCTELLPLIKPQGR	PRDX5_HUMAN_THLPGFVEQAEALK	PRDX5_HUMAN_LLADPTGAFGK	PRDX5_HUMAN_FSMVVQDGIVK	BHMT1_HUMAN_AGPWTPEAAVEHPEAVR	BHMT1_HUMAN_ISGQEVNEAACDIAR	DCP1B_HUMAN_TDVEGTLFVYTR	ANXA4_HUMAN_GLGTDEDAIISVLAYR	CYB5_HUMAN_FLEEHPGGEEVLR	HS90B_HUMAN_GVVDSEDLPLNISR	CNDP2_HUMAN_EGGSIPVTLTFQEATGK	TPM3_HUMAN_LVIIEGDLER	AMD_HUMAN_EGPVLILGR	HSPB1_HUMAN_LFDQAFGLPR	HSPB1_HUMAN_LATQSNEITIPVTFESR	RD23B_HUMAN_AVEYLLMGIPGDR	PECA1_HUMAN_STESYFIPEVR	CATZ_HUMAN_GDGLAPLGR	EPCR_HUMAN_TLAFPLTIR	EPCR_HUMAN_CFLGCELPPEGSR	LAIR1_HUMAN_GPVGVQTFR	LAIR1_HUMAN_FRIDSVSEGNAGPYR	MUC18_HUMAN_GATLALTQVTPQDER	AACT_HUMAN_EQLSLLDR	AACT_HUMAN_MEEVEAMLLPETLK	AACT_HUMAN_ADLSGITGAR	AACT_HUMAN_ITLLSALVETR	PEPA4_HUMAN_QYFTVFDR	PEPA4_HUMAN_ANNQVGLAPVA	LAMP2_HUMAN_GILTVDELLAIR	LAMP2_HUMAN_IPLNDLFR	ENDD1_HUMAN_ALTPQCGSGEDLYILTGTVPSDYR	ENDD1_HUMAN_DSDIIEDVMVK	ENDD1_HUMAN_ILEVVNQIQDEER	CD59_HUMAN_LRENELTYYCCK	PTGDS_HUMAN_TMLLQPAGSLGSYSYR	PTGDS_HUMAN_AQGFTEDTIVFLPQTDK	LYVE1_HUMAN_LLGLSLAGK	A1AG1_HUMAN_TYMLAFDVNDEK	A1AG1_HUMAN_NWGLSVYADKPETTK
1016	HC	422.95	273.809	51.3161	704.346	1180.24	4858.63	9245.49	116.693	1673.55	1008.2	2640.51	627.989	13350.7	24.8034	2719.44	1736.41	13453.4	51.3161	2035.4	26985.8	2260.15	11686	3495.28	735.669	14769.4	2704.48	655142	160469	0	41665	20523.7	83398.6	41482.2	226182	30590.4	1.87516e+06	55096.8	68352.1	341536	38442.5	12062.8	121584	23108.9	8.51218e+06	2.60451e+06	62036.8	74467.6	26062
1049	HC	820.927	238.226	20089.6	7179.72	1589.78	1838.49	8028.13	3382.4	2251.58	751.704	5381.67	974.61	11107.2	9328.99	3402.38	1871.79	15673.3	20089.6	3166.43	35507.8	3361.89	11539.5	4787.4	3243.81	21922.4	8589.3	627476	245044	407051	77643.1	19175.2	80458.8	42139.4	137272	24710.1	1.8726e+06	79102.3	75105	402649	44717.8	10134.8	60328.5	1.34793e+06	8.82759e+06	2.535e+06	35912.3	32251.5	14027.6
NU157	HC	2302.34	246.65	0	355.094	401.263	4904.04	901.672	1327.56	777.828	118.906	584.663	2851.41	4405.52	0	1004.05	235.261	4176.46	0	1786.27	2648.38	2981.05	2433.53	6232.85	0	12160.2	2308.32	765963	44103.1	0	460.291	3775.27	370.272	472.262	4243.56	1038.29	296473	515.912	233.216	42747.1	14033.7	1223.63	86971.4	224301	7.91303e+06	115727	2174.82	8017.47	925.488
NU171	HC	0	213.437	0	1669.07	343.606	1243.51	1400.93	1029.28	149.845	0	871.978	0	7325.96	29.65	716.638	256.192	8184.1	0	1349.16	34893.4	1211.17	7251.33	1051.76	894.739	9672.88	11470.7	626303	57620.5	0	9370.86	28290	129716	10932.5	277943	6376.57	1.51502e+06	38879.2	480.193	532914	4038.28	8683.3	46994.1	240824	1.31724e+07	409140	61726.3	36223.2	7620.72
209	HC	177.606	0	8301.39	3135.19	209.677	227.22	1920.64	1516.9	733.126	412.665	4450.98	1846.41	25447.6	2289.22	371.963	1721.64	30948.4	8301.39	4282.33	25063.8	2764.7	46730.3	14394.6	1181.09	17512.9	1975.63	927886	56842.4	110130	38053.9	18486.7	54888.2	8006.44	25844.5	13746.1	810899	11418.2	4867.74	397131	6639.28	3874.58	33120.6	437775	2.28072e+06	274039	13262.5	13696.3	1852.29
242	HC	895.84	1140.93	11936.6	315.42	1121.8	11032.2	25336.7	152.551	3389.01	236.709	3806.91	676.987	55055.8	31473.3	2370.92	1031.96	12058.9	11936.6	4695.99	12773.9	894.422	21615.6	6847.11	1869.83	13224.8	1980.08	1.42365e+06	256300	352.594	641.853	23766.8	140205	85417	319.691	65612.6	1.32736e+06	33000.9	100223	568891	30417.3	9490.84	100175	3807.29	3.62821e+06	3.02656e+06	97202.4	38378.9	88695.1
62	HC	1241.73	1222.97	3681.79	194.419	265.867	3243.57	525.413	1696.61	373.918	3803.29	593.81	1697.98	6029.82	245.266	637.733	545.079	7300.67	3681.79	0	6040.49	0	3034.85	6222.03	437.965	7162.17	284.602	195032	19573.7	225.261	1285.06	19726	4511.65	401.402	192.101	2915.83	68333.6	337.391	196.737	19206.3	6968.27	1328.78	73456.9	12767.1	3.36519e+06	128090	1523.66	1029.55	874.314
676	HC	1237.75	990.859	0	11644.8	1126.05	4355.34	5372.21	2350.64	0	693.636	5564.59	1453.07	5776.24	107.336	387.64	0	13030.1	0	2182.03	16728.1	1848.09	83554.5	26171.8	2987.89	11510.3	9207.5	658500	56825	0	22221.8	22055.2	30277.7	3179.23	76667.8	11313.3	582635	3751.38	4859.3	377234	3764.18	1971.28	21142.3	363233	3.19581e+06	188123	16167.7	11582.1	1449.04
977	HC	903.326	341.374	51.8808	2333.65	1076.71	6001.65	14401.7	134.591	1140.82	532.47	3889.17	633.819	11669.2	8.64232	2804.67	745.056	9783.56	51.8808	1938.28	28809.9	1912.94	7318.23	1934.18	2242.74	11058.5	26295.6	457962	39180.4	8.64905	38520.4	19140	118747	54622.8	311140	61583.4	819947	31621.1	28263.1	205040	34261.6	10605.9	71665.4	744596	8.29827e+06	1.79819e+06	110760	142552	219011
D896	HC	0	1304.91	11686.7	1753.91	902.119	2143.38	7405.78	595.666	3839.92	1553.25	6816.35	1655.27	10683.9	4523.11	0	2564.54	33790.3	11686.7	2656.35	4323.54	1709.31	32755.1	28137.1	1468.46	15221.5	0	784857	158977	6987.49	14514.5	15286.3	93297.9	88541.4	263649	64917.6	742728	32664.8	173674	801475	25564.3	2833.87	48771.7	7386.4	3.72294e+06	1.01474e+06	44316.1	43324.1	27574.6
D928	HC	1189.64	1425.53	17671.7	11127.4	1752.47	20647.3	40898.9	403.664	2654.55	422.407	5597.95	1363.26	13935.3	7651.14	1008.34	1576.53	27281.3	17671.7	2070.64	12674.4	5491.06	75225.7	19951.4	3465.92	26232	6017.26	1.47021e+06	277023	437616	55868.6	25750.4	64426.8	60165.6	118823	35733.9	1.32378e+06	1809.11	61575.3	599947	27262.8	6572.63	51921.5	562742	4.56729e+06	1.28349e+06	53537.1	65370.1	16331.8
NU149	HC	167.614	623.276	17118.2	4142.07	1529.17	7556.11	3450.68	341.991	514.045	609.276	74.495	822.916	14635.8	5645.49	1304.75	0	7303.33	17118.2	2666.71	26124.1	1342.47	3563.83	4812.21	465.775	11776.1	8090.03	11045.5	45996.2	65809.3	143216	22844.5	8941.96	434.499	164152	16474.3	572162	44100.1	14199.4	206549	22134.8	11792.1	43066.8	35586.9	52456.2	364474	2039.11	6083.87	978.944
Nu150	HC	1160.51	1182.55	49303.9	5297.78	1637.98	14373.6	4136.45	2484.01	1982.07	596.416	785.191	2445.67	37615	14098.3	1225.01	932.422	17964.6	49303.9	7131.55	29484.9	1771.67	4385.07	16204.9	157.251	15226.9	6775.18	15256.9	268203	43498.5	283760	20216.8	1980.44	38.4701	70144.5	17835.5	614502	46468.4	9424.72	140351	14762.4	5345.86	22070.8	86114.5	4871.35	123639	289.768	1540.36	111.167
NU151	HC	5572.97	342.222	3883.22	1143.44	580.638	0	1989.04	0	0	305.317	931.09	0	942.675	11829.1	0	1664.71	4392.24	3883.22	0	3009.42	0	4365.39	6725.78	0	3901.58	696.49	27268.3	42456.5	2814.13	165961	64851.5	231.704	595.154	67939.2	673.687	66994.5	113.404	353.808	8565.49	4465.79	464.349	11108	51136.3	157372	10713.8	342.222	1358.06	0
Nu222	HC	1038.48	255.196	4247.59	2118.63	2142.05	7368.61	2660.97	0	482.732	0	763.968	3983.15	13709.5	10738.3	0	590.317	25865.2	4247.59	1699.93	8534.37	1692.77	304.17	6059.21	0	32959.6	3501.91	2140.17	149518	44434.6	206066	19578.8	1998.28	263.127	79775.4	13925.9	906079	227.116	2641.54	30948.2	44233.1	6916.39	31527	25598.2	16712.9	512870	948.469	7142.85	2156.48
Nu243	HC	36.7916	980.51	23160.8	13903.3	2970.08	7043.23	3570.22	2020.88	4975.48	1448.93	1151.38	2148.17	90443.5	73162.5	1423.25	1256.84	6012.84	23160.8	8084.36	12438.5	3695.3	3091.82	9025.04	389.328	22986.8	5849.78	25064.9	310412	109418	243845	20816.8	13243.1	1516.03	109327	19988.4	633357	69889.6	20977.2	143504	28366.1	9836.28	35649.8	314244	66344	692829	4860.5	11608.8	5731.34
Nu253	HC	0	574.336	13448.5	5004.04	1166	11541.9	7764.35	887.331	1855.23	1439.42	1382.54	1334.2	16161.1	9843.13	576.426	1405.18	1645.79	13448.5	2401.77	3221.92	1867.56	1301.63	3116.55	437.778	14995.9	9528.03	30977	36095.1	64263.8	67137.9	12708.8	38067.4	5607.51	94415.3	7368.16	791524	106816	7195.02	99722.8	38204.1	20920.7	61994.2	402562	360876	2.89365e+06	6895.79	79164.8	35304.7
Nu257	HC	0	633.633	15512.3	5775.31	1452.11	12134.2	9030.01	1073.16	2411.15	1537.03	1984.04	1630.74	17992.5	10068.7	602.664	2092.38	2607.77	15512.3	2804.27	5574.12	2454.97	1984.08	3124.32	246.217	15476.5	10954.3	58849.1	53391.3	67157.3	93414.6	13079.6	52041.5	5754.71	129132	11480.4	924532	109803	13460	117568	23272.6	16444.6	81582.1	518650	2.43397e+06	4.3778e+06	7233.88	93190.4	78721.4
Nu262	HC	129.681	384.737	14602.5	5655.27	1398.74	11931.9	3441.23	1242.21	3119.82	2396.08	833.227	2240.4	18963.7	18837	0	633.169	7613.08	14602.5	2104.11	3931.77	2334.09	757.378	5849.66	245.255	28429.9	3127.4	5255.69	309533	49737.8	353137	12801.2	2081	0	41442	4177.52	521477	43221.1	5628.94	51976.9	23326.8	6550.38	26003.1	30663.2	13258.7	396878	784.123	5699.92	3605.17
Nu264	HC	704.857	0	11536.6	13283.9	1367.49	2694.61	2272.04	993.793	1676.62	1159.04	1137.73	1384.55	70045.5	41859.2	1592.64	591.477	7044.39	11536.6	4934.16	12125.1	2789.55	3571.35	11138.6	141.427	16890.4	7357.89	34488.4	244005	109769	182643	21724.6	22450.7	2519.22	113317	18368.1	801616	50523.7	31137.9	129739	15644.1	11067.1	32771.1	201690	86693.8	1.4889e+06	4305.22	14525.7	9795.38
Nu306	HC	1215.2	1013.34	36791.2	2077.15	821.573	4927.42	10450.3	900.299	710.55	1073.9	3490.17	2725.12	8682.03	3607.25	502.633	1148.59	26799	36791.2	2523.26	3532.56	2876.52	6919.79	7450.68	2678.69	25242.7	4917.33	123220	101518	128832	255455	28420	88843	3914.08	96358.3	9761.99	549078	322.977	123521	302682	14842.8	13668	48622.2	104267	113539	1.20527e+06	8849.58	108365	25493
Nu321	HC	982.64	2154.18	74944	7206.66	2381.23	6433.91	1253.58	2348.8	3955.36	372.068	1371.88	4331.25	39899	25747.1	110.666	2459.46	44318	74944	13226.5	15495.2	2606.38	6590.37	25605.9	2921.21	30671.7	5575.29	10980.8	202021	52343.2	321129	38622.5	6344.23	1743.95	104793	35716.6	951509	307.194	56018.1	430408	12598.8	10793.8	25783.3	22417.6	18574.8	213069	568.596	4048.86	1385.24
Nu329	HC	777.905	337.554	21860	3588.86	2931.29	7711.16	1248.47	1859.98	2741.06	561.688	267.975	3935.18	21082.8	17690.4	274.943	1145.24	18047.9	21860	9484.33	35150.3	2412.66	3481.19	12731.5	0	29791.2	7893.89	41379.8	857892	67380.4	445529	41410.2	3235.59	325.648	119394	12049.9	911303	113.186	9556.22	184964	50132	8430.7	31355	149898	29795	217902	535.438	1629.92	0
Nu350	HC	806.782	2985.32	100109	7276.85	3534.47	41281.5	9152.57	1774.02	8006.8	264.407	1986.45	5272.33	37313.1	11496.1	271.187	8824.88	21437.3	100109	19331.1	36386.5	3351.42	12214.7	13807.9	2962.72	47139.1	6144.65	195255	190339	80562.9	249094	41934.6	3645.21	1792.1	117295	55051	2.66522e+06	987.573	21010.2	220801	46481.5	21243	75652.2	297712	381429	904377	1100.57	9887.03	1629.38
NU355	HC	0	0	10335.3	3449.69	458.1	23931.1	4597.14	335.015	1930.62	1143.06	465.099	0	7703.87	4867.92	1034.32	1087.84	5568.44	10335.3	3513.27	6091.24	3878.73	1023.27	3193.87	0	23011.7	23267.7	11674.8	99208.6	60964.5	151191	9866.97	22217.2	4659.07	90612.4	10111.8	679599	68704.9	13479.9	136955	54378.6	32219	85872.2	193554	132987	2.1963e+06	11606	229017	214594
D356	CRC-NM	635.558	993.665	23438.1	2837.28	4082.77	4924.59	1845.21	673.088	1601.73	1495.32	754.509	2992.18	132533	93147.5	370.843	3849.72	8083.1	23438.1	4325.09	22610.2	1270.94	2022.84	8538.58	1533.33	3507.91	5185.11	63769.2	107470	10501.2	1918.1	13832.9	3675.05	0	63090	5021.6	385713	25593	2726.36	25149	22889.3	3782.82	20877.7	487743	281550	164876	221.912	709.165	258.633
D150	CRC-NM	0	984.025	11158.5	9931.75	1040.92	8564.22	6343.02	1995.39	2431.79	749.076	2094.27	2538.94	59560.6	30185.2	2898.89	877.391	2947.78	11158.5	2707.28	54259.2	2922.57	2822.3	4715.03	338.85	910.456	7053.91	17726.5	27307.5	8466.17	18964.7	4066.33	6915.95	0	29895.1	673.339	95938	16044.5	0	2981.2	5893.52	4986.44	13705	111278	106228	31181.7	0	5066.34	2684.84
D159	CRC-NM	3340.12	877.87	12917.1	340.998	1624.45	14200.9	1907.86	220.156	2236.71	0	0	1417.29	30010.4	56912.1	1733.27	1823.53	3142.84	12917.1	19552.3	18398	887.818	10079.8	25303.4	431.556	0	2415.22	7278.16	30790.5	0	23179.3	9391.66	0	0	22337.5	0	58759.7	13961.5	0	0	3461.97	2196.53	7987.87	15032.1	30907.1	13456.4	0	0	0
D160	CRC-NM	3982.91	3499.73	33012.1	30725.5	1833.9	7411.17	1852.59	3830.58	5145.18	1072.92	4301.72	2788.34	131787	70960.8	3218.9	176.061	1872.51	33012.1	5492.76	58329.1	1231.32	7380.45	10114.6	0	581.526	5305.81	2509.72	5328.43	2041.5	5848.31	3036.86	5131.13	0	16014.1	0	101869	14404.2	0	3928.46	2763.78	2658.17	6070.36	25867.3	18541.3	14170.5	0	1742.42	0
D162	CRC-NM	460.207	728.02	9184.1	10477.8	1288.51	23829.8	9825.22	2632.77	4408.26	2654.43	3585.07	3669.63	32537.1	17262.8	4110.94	2087.53	0	9184.1	4158.86	70135.4	3612.1	3257.22	4696.92	0	2961.81	2017.05	12446.1	26483.2	12571.7	32572.9	9388.37	1671.43	157.285	24657.2	648.068	123910	19555.1	0	2090.66	3266.03	2808.94	5545.69	82004.2	54254.9	8578.91	0	1347.39	0
D164	CRC-NM	1364.5	1485.75	25736.5	27559.1	1655.59	13707.2	16018	3651.71	4698.25	2138.24	3005.96	3725.25	260214	192476	3828.57	1827.64	312.164	25736.5	11890.9	49859.6	2358.35	5198.13	15750.3	1692.71	282.806	1303.04	2942.92	8886.04	4041.33	9690.96	1203.91	3510.31	0	12532.2	0	22916.4	4430.01	236.893	3836.39	1437.19	774.623	2232.11	23688.2	11779.1	7043.91	0	1287.59	0
D168	CRC-NM	1241.62	441.319	2888.37	0	0	6141.59	0	332.31	799.885	0	0	0	13977.3	7837.67	1718.05	0	3978.27	2888.37	1535.87	26515.7	756.56	0	1148.18	0	3140.59	7616.02	34895	83512.3	2219.75	126317	13192.1	4553.78	0	94377.1	632.326	281433	42902.2	0	4017.41	9280.85	6672.01	22453.3	175210	205535	38433.4	0	2159.79	0
D175	CRC-NM	466.656	403.221	3498.67	0	905.419	25152.3	5007.06	173.643	2493.39	760.047	980.493	1637.88	57215.1	30864.6	2723.74	1108.14	481.87	3498.67	4061.58	34187	2646.52	2933.94	6093.87	0	867.965	957.219	8059.06	23812.8	293.792	2942.75	6914.22	2212.48	0	9789.46	0	33058	5790.19	0	1673.52	2641.6	974.22	3026	27921.8	41520.7	6791.46	0	1180.05	0
D176	CRC-NM	467.593	460.135	4565.98	2654.2	615.123	3388.87	1035.1	1825.75	567.645	0	0	1115.78	17576.9	10666.3	0	275.068	9673.75	4565.98	1706.05	7443.42	791.481	4537.51	4697.11	774.771	0	698.762	895.245	0	0	0	0	1810.11	0	18609.1	463.883	11777.1	1302.54	0	362.36	1743.67	208.627	430.762	3733.24	3336.06	1122.88	0	4148.59	1350.84
D177	CRC-NM	1354.62	1967.5	18731.7	16079.4	6044.48	10961.8	97184.4	5310.03	1550.27	1420.45	24220.6	4699.54	26500.3	67680.7	3395.12	3695.01	11728.6	18731.7	8641.32	42314.7	14380.7	18543.7	9976.24	5861.29	2037.49	1172.69	414988	29634.8	20791	7885.81	3727.4	17377.4	8585.4	31139.8	11210.7	310560	331.606	17662.6	57436.3	2274.7	792.13	8200.57	10899.8	983723	86739.6	3650.09	10627.8	828.385
D184	CRC-NM	5127.98	5117.5	32578.3	2882.37	4106.82	7834.3	109859	3832.96	589.712	853.039	14220.2	2742	3713.26	10407	1620.82	4008.83	4518.11	32578.3	9808.06	21705.3	5947.33	65559.8	23426.3	8679.56	823.064	2186.14	151227	9694.6	16020.9	2008.87	3946.39	21298.5	18499.8	76037.7	44447.9	87930	177.847	24172.6	59587.6	3141.86	966.516	11715.2	3280.13	455643	86923.4	8202.8	7378.57	686.506
D205	CRC-NM	7224.3	2793.81	20629.6	4261.07	1534.08	5854.03	60477	2563.98	416.672	0	8483.58	912.275	2498.66	2319.57	494.146	2895.91	2107.41	20629.6	1665.34	36839	3116.98	25394	8842.25	2826.49	707.105	2264.06	65884.7	2850.28	8127.85	1058.35	2803.26	13082.3	6106.64	15838	15026.1	224483	553.96	8794.27	17307.2	1685.51	631.779	15349.4	2191.93	641665	258327	8432.18	10516.8	2083.6
D213	CRC-NM	831.596	1651.8	30080.4	13825.6	9301.85	9405.33	791.771	3033.1	7975.81	2858.5	4243.92	8787.53	71355.4	34471.5	4397.84	3738.57	3912.92	30080.4	9846.3	59655.6	3933.34	7610.59	20038.2	0	2387.23	5793.94	15261.6	43795.3	7409.5	5735.78	6867.45	1085.36	296.078	92927.6	3550.01	32688.4	6149.47	0	3193.33	1905.27	1142.91	2002.42	36766.2	28646.9	6693.88	0	4980.77	1199.19
D219	CRC-NM	1828.94	4721.03	45502.3	35629.1	2775.46	9943.39	64442.4	2098.97	794.59	1818.38	15562.5	5849.22	42734.9	22496.8	2134.18	842.746	878.893	45502.3	6263.67	28562.7	16147.2	37514.5	16318.4	5788.44	681.53	4576.47	164342	12064.6	8974.29	340.462	5482.08	41411	9953.8	34468.6	24995.8	127825	11560.9	8803.79	35164.6	0	632.75	2404.72	4050.58	82211.9	8794.54	1236.53	2175.16	268.264
D237	CRC-NM	974.172	4676.02	77798.9	21088.1	7300.97	45913.6	30678.2	2147.84	4718.64	2445.13	5544.98	6477.44	146888	104200	11193.5	5387.26	762.087	77798.9	18385.5	126036	6127.57	16633.5	60273.6	2768.11	1341.87	7232.69	7705.43	45092.3	5174.75	16946.9	13232.1	9218.3	689.988	40807.7	745.654	36482.7	5553.93	1064.4	6273.59	4228.65	1182.57	3382.75	41121.6	8345.52	12322.9	265.331	1345.3	1020.53
D241	CRC-NM	2158.38	1024.32	43980.2	1926.07	2475.91	14985.5	7531.65	263.279	2037.13	628.015	1663.47	2337.82	50347.9	34182.7	3943.88	2867.66	1000.31	43980.2	11848.6	44082.8	2321.44	3933.54	15882.2	305.037	1098.02	3166.6	1310.18	3913.53	225.116	1310.87	1417.79	1208.48	145.041	17011.7	338.504	18356.9	3674.72	602.967	8043.97	812.671	937.956	3204.07	9235.11	40674.5	15828.5	918.344	5350.05	1548.78
D246	CRC-NM	10743.2	3766.99	63989.7	5414.58	4985.78	7669.97	1028.74	910.47	4412.63	2415.42	4094.69	16099.1	76626.1	28008.5	454.698	3719.11	833.701	63989.7	16982.7	17685.1	733.888	21841.5	83760.1	0	0	3054.89	1679.3	6625.64	863.648	1622.73	1900.02	0	0	2797.12	267.347	6995.14	3916.44	0	0	474.149	586.838	1509.86	1292.79	19487.3	3588.27	133.063	2210.8	335.506
D267	CRC-NM	1125.9	485.966	29266.1	421.734	1210.93	2396.32	20997.6	1838.6	358.816	419.66	3109.06	410.512	15115.7	2533.59	155.357	486.187	3681.9	29266.1	2755	22151	834.384	9026.31	5775.7	709.959	418.916	8189.71	12944.9	4556.7	328.567	520.128	3854.49	33962.8	3871.14	121.547	11909.2	67037	35220.8	2517.55	15570.3	0	0	10042.4	1430.09	261376	96001.5	4574.53	20872.4	11997.9
D269	CRC-NM	16810.3	0	6888	0	1969.53	4587.48	55337.5	8327.79	667.786	0	12353.6	2477.03	58496.1	2034.12	3140.22	480.009	3274.24	6888	14703.1	58326.1	7314.53	17211	14314.9	647.056	380.308	2272.8	26481.4	579.424	525.027	421.974	2556.19	23096.5	2580.29	187.845	10047.8	72818.1	43545.7	4378.17	17990.9	0	128.277	4467.78	1855.04	35768.5	36535.6	1766.67	338.435	1008.64
D322	CRC-NM	2521.31	303.689	3088.86	610.571	922.611	11652.8	2420.83	0	1754.44	96.5035	1632.26	983.899	17768.2	7110.9	0	2147.03	3595.02	3088.86	2898.43	3417.95	0	1356.53	10434.9	445.401	5343.37	1259.37	55692.8	61086.2	7883.07	66077.2	13192.4	630.065	1332.86	23461.5	1405.75	68934.2	301.11	604.485	8039.98	41041.1	5589.23	74135.2	27196.1	463432	195240	0	1122.43	0
D129	CRC-LNM	2235.58	5725.77	35838.9	18066.3	1449.53	19262.9	193374	2942.45	1332.19	3797.92	48385.4	6894.02	30360.4	32706	2083.43	5865.06	2645.44	35838.9	5458.81	60122.7	12052.1	134665	17389.9	20408.4	4250.06	1509.3	493900	26208	98810.1	7623	5769.82	28159.3	12620	64548.8	16834.4	284189	0	8670.48	64353	3521.18	1717.5	12456.9	12571	658715	53607.1	7514.83	1956.55	0
D182	CRC-LNM	2622.88	6681.19	142312	8513.66	3909.02	3345.18	0	3584.82	5555.8	0	0	2677.3	21983.8	6978.32	1308.41	5887.2	0	142312	13013.3	12772.5	0	17060.9	57490.4	0	0	4522.33	7438.23	15641.7	0	0	3836.25	2898.24	0	107424	2016.72	0	0	0	2683.61	2991.78	1914.26	3094.18	6574.69	5895.28	689.302	0	0	0
D190	CRC-LNM	5044.48	8623.57	212329	0	4317.77	2478.35	13719.7	154.409	4323.09	965.71	9720.19	875.176	6309.03	9742.97	2607.39	3450.16	4431.73	212329	17628.5	54056.6	649.087	121386	41312.6	8069.04	230.582	397.931	58799.6	5256.7	143.603	185.814	3468.25	25955.3	19802.3	129.519	19334.2	97790.5	6616.73	38283.4	168870	6377.38	949.536	5317.2	1228.72	332718	51788.7	53.6582	5543.4	697.832
D222	CRC-LNM	15658.3	800.029	11201.7	1112.84	7113.09	1874.12	0	1236.2	3632.45	805.034	1234.83	4330.19	49103.5	50012.2	1536.01	1809.33	777.712	11201.7	21317.4	22144.3	425.689	7210.43	41347.6	1234.58	0	3640.73	1257.05	7458.07	0	6199.17	3830.85	0	0	18869.6	0	21777.6	6995.19	0	0	2689.64	1694.18	5614.35	6767.14	15813	3597.57	0	1328.78	636.927
D223	CRC-LNM	8970.66	3651.69	51048.7	3670.57	6198.78	23970.3	7924.16	598.869	8249.51	1099.91	1921.64	2530.02	89638	114806	4641.9	4677.35	508.508	51048.7	26076.1	41414.2	2190.79	8333.39	99556.5	3017.54	0	0	1266.77	6977.64	0	941.828	1939.48	188.814	0	5469.6	0	4926.3	1888.26	0	0	4191.31	0	1714.85	4443.33	3329.2	3810.39	0	351.105	0
D229	CRC-LNM	2949.53	1942.05	43635.6	619.085	1507.71	3505.73	2396.74	737.576	1302.35	198.327	3252.33	1188.38	8023.45	560.238	1327.34	2744.35	492.229	43635.6	4974.7	35318.6	830.489	11425.3	9722.99	1847.59	153.78	323.096	1720.3	0	147.583	238.549	1400.06	9981.11	1241.32	75.459	361.969	2398.24	144.079	1935.65	26603.5	2372.72	880.688	2358.9	3713.52	15082.2	2177.07	107.965	338.921	574.046
D236	CRC-LNM	1211.03	3924.72	61953	188.904	1042.14	2815.1	1257.99	524.343	763.453	105.704	460.786	210.001	2254.24	488.723	1569.48	161.484	416.577	61953	9042.67	31215.2	1945.96	25831.2	19022.6	2736.72	146.43	2358.73	2580.39	1862.58	868.745	176.86	0	1235.89	0	98.6554	207.281	2345.46	699.079	41.7803	9494.88	676.443	354.353	1676.71	709.909	28050.4	4004.64	121.763	0	1042.37
D245	CRC-LNM	6643.04	1343.92	43382.5	5799.83	6211.84	20485.2	2338.85	244.149	10321.9	3890.49	2206.75	8073.4	46580.1	39867.4	2736.08	4963.81	892.952	43382.5	13669	44319.7	2296.52	6611.41	31354.9	0	969.144	4068.38	3831.66	17719.2	149.671	1513.52	7773.96	2749.08	0	40510	588.11	30662.5	4463.22	0	716.841	5190.93	1812.13	6419.15	0	19773.6	19474.4	71.7175	1330.81	319.697
D266	CRC-LNM	1218.8	1149.84	3476.82	3526.28	2680.8	2167.27	272.982	313.249	956.014	775.953	586.737	1168.28	57836.9	24901.1	3876.6	573.386	1057.59	3476.82	3589.26	45717.1	1512.43	9164.63	28922.5	446.544	712.67	7501.19	5353.24	10707	1351.93	7404.13	3171.82	431.963	0	17276.9	728.969	52925.5	9714.93	0	1841.85	1581.96	640.028	5655.71	18097.2	108835	22052.7	69.0175	7665.62	308.239
D334	CRC-LNM	1666.92	2194.17	22163.5	15898.2	4307.56	87697.8	40982.8	2527.55	6929.11	4799.56	3019.55	4000.61	43898.2	41925.7	0	9703.4	3038.65	22163.5	17960.2	3695.13	6335.77	25811.6	41590.8	1960.65	8424.2	3797.29	162692	75847.2	30195.5	82976	10710.9	2724.06	3564.42	60529.1	22608.5	439868	45227.9	2139.83	14635.1	27775.2	8576.94	20609.6	359447	175393	337015	545.884	11932.8	1519.59
D316	CRC-LNM	526.806	1053.03	12440.6	19307.5	6447.56	6850.62	10199.8	1743.4	6224.64	6779.24	7301.5	6373.53	124250	34569.5	1379.75	1532.98	984.921	12440.6	6331.22	12303.9	4912.09	9293.67	20786.8	1098.88	1973.79	4317.43	66143.9	69759.2	4583.11	4983.54	5131.87	11806.7	3138.62	31713.4	1833.4	85491.6	9354.61	4388.42	10592.9	6644.31	2231.61	7839.84	34976.7	107910	108402	406.051	5846.23	4082.58
D337	CRC-LNM	746.902	1179.29	8677.76	4517.17	4866.46	21467.8	13640.9	760.953	2751.08	1897.99	383.202	1136.4	15722.6	17377.1	183.678	3210.1	2864.27	8677.76	6593.07	1937.68	5777.9	6288.73	18982.5	1321.8	2282.04	4690.24	73920.7	49106.2	57258.9	256.575	9527.19	2078.55	2421.53	72906.2	14331.2	396879	32296.8	1948.91	12372.4	20367.4	2823.61	15731.4	419497	215721	143622	203.105	278.773	130.389
D345	CRC-LNM	1264.59	1167.33	15447	5387.74	6880.63	42792.6	29416.1	727.491	3354.31	1405.81	812.418	1235.2	38506.1	51797.5	441.219	3708.57	3172.7	15447	6804.94	2377.01	4561.48	4946.76	9671.36	1085.72	5243.69	6264.7	256711	267250	88308.5	107494	11529.8	1571.85	2731.15	46478.9	10606.5	877319	62868.2	1592.34	15291.6	17713.6	2373.04	17501.3	495452	181995	200570	780.601	434.259	130.972
D357	CRC-DM	4643.52	210.293	2476.95	7002.51	4297.33	2415.55	4666.52	1280.68	3033.98	511.726	1940.89	2284.27	19944.2	33566.9	281.511	887.138	8173.56	2476.95	7453.85	17122.5	2284.5	2335.89	9043.91	1779.84	3476.15	5078.53	61115.4	104056	12385.9	22603.2	12545	22991.5	7144.77	171480	6450.15	267698	304.377	1431.16	4143.39	31746.9	11479.4	52803.8	228962	419733	465774	161.628	11029.6	4384.99
D127	CRC-DM	283.392	0	5170.39	30695.9	1661.89	68245.4	11734	10022	11258.3	5944.66	4753.4	11856.9	135022	31219.2	11971.3	5706.3	1467.06	5170.39	8119.69	158034	7633.37	14225.3	8380.31	0	3085.94	5744.26	32073.4	23625.8	38117.3	74413.2	8908.13	1389.63	0	121242	9814.98	134433	15202	1229.21	15467.1	1750.45	0	2923.49	69242.3	116337	8844.87	0	7922.83	0
D130	CRC-DM	213.845	2189.93	16200.9	28678.4	1077.09	19995	19561.4	2359.83	2103.54	1138.24	7851.64	1966.01	36310.7	23905	1581.69	1428.38	776.204	16200.9	2600.77	41279.6	7968.14	16111.5	3610.2	7931.42	759.026	3506.99	36792.9	31963.7	26585.6	13963.7	2967.39	16435.2	1660.97	33421	3175.92	350963	33150.3	3687.61	30867.5	1985.36	1723.23	3017.62	130205	234681	26084.7	101.258	9295.74	0
D139	CRC-DM	319.036	435.632	9358.39	5987.39	628.092	11526	6184.1	2796.03	1563.65	849.836	1384.88	2338.57	122091	18504.5	1574.61	1518.23	3005.94	9358.39	3367.75	22679	2463.4	6504.25	3665.46	0	0	11066.6	21820.7	23893.3	4607.01	25372.3	3720.46	0	0	57848.3	2187.5	132838	26410.2	0	4481.94	3273.24	2615.92	3674.17	36193.5	66508.5	17131.6	0	6040.57	0
D154	CRC-DM	567.041	784.056	4052.17	8885.04	1942.22	16688.9	19103	1831.05	1806.41	632.285	2632.47	741.493	19022	13208	883.463	1506.79	727.772	4052.17	1963.22	11732.6	2235.96	7360.05	1645.68	1943.06	1411.3	4796.74	72898.5	43779.2	17334.4	5225.18	2697.43	8375.96	586.082	15824.5	2248.56	172919	10966.4	3422.41	22636.3	43.9632	987.911	2399.77	51750.2	167314	25558.6	99.1271	2655.99	723.572
D179	CRC-DM	448.288	3201.25	25075	12300.5	1109.58	13803.5	25042.2	1357.98	2048.27	500.332	3315.29	816	27537.2	21545.5	1181.16	815.043	786.388	25075	4958.42	24565.8	3637.62	11047.7	4589.14	4546.57	672.274	4447.38	46686	53568.3	19130.8	8677.34	4255.02	9726.23	1554.27	24204.3	2728.1	32476.8	3693.36	3927.6	36122.6	3906.55	2383.32	5739.67	98661.4	546765	63777.7	197.551	6850.77	0
D185	CRC-DM	2347.28	2745.44	23507.7	31363.6	10589.8	6942.78	9144.24	2566.74	2880.74	2013.71	8783.9	2175.41	72910.2	52804.2	2073.43	2159.15	904.8	23507.7	6788.89	34666.3	4857.21	50683.1	16746.5	5006.49	611.204	2428.36	21986.7	24859.5	14340.4	6358.63	2682.78	6569.87	536.353	10966.1	1558.18	115288	10174.1	2199.4	14183.5	2750.25	1585.66	4784.16	24225.4	315035	71230.5	0	3950.8	0
D259	CRC-DM	1255.3	2606.3	28245.6	8144.64	0	5598.88	17228.2	1950.15	4531.34	0	5484.74	0	11324.4	17466.1	672.568	3155.11	13497.4	28245.6	8847.6	17814.6	3396.97	25822.1	12226.5	4014.8	14675.9	6032.38	1.13363e+06	149832	395602	95136.9	13829.7	31499.9	41746.2	59920.9	35006.9	840331	0	68336.6	531995	21923.7	8085.95	28922.7	1.06617e+06	5.97949e+06	2.01692e+06	18028.6	10877.9	1572.42
D268	CRC-DM	4335.34	848.262	10554.3	26874.1	2126.79	6649.27	4752.05	3070.07	3924.38	1703.64	4021.03	3738.34	150053	66122	7290.78	1398.86	11954.6	10554.3	10146.9	83468.1	3712.33	70420.8	52091.5	591.422	965.277	6800.31	31973.9	18519.1	11017	15737.8	4994.23	982.855	572.142	31682.8	4054.84	196747	17455.3	788.239	7636.91	2107.02	1784.23	6112.01	32722.5	176299	11765.1	1670.43	12865.1	434.09
D280	CRC-DM	1432.74	14074.2	109227	54636.4	6377.8	7348.62	13794.3	4166.1	5503.14	1191.26	8599.71	2339.27	125549	107998	2028.24	2775.58	1363.64	109227	22753.6	47205.6	3742.17	107534	34371.3	7227.72	465.135	1956.12	40890.8	38848	9924.69	6160.76	2715.84	13278.6	1553.42	20161.3	3972.3	90573.5	6528.5	4557.41	34560.1	4043.75	1882.28	5978.91	28532	640563	58957.9	566.308	10772.6	1056.32
D281	CRC-DM	2077.37	458.517	5379.2	16480.2	3722.77	2294.49	4717.58	2978.67	3190.3	1874.73	16363.5	4983.6	15572.7	14140.5	3726.35	1098.42	2630.27	5379.2	3387.08	66484.1	6040.36	31607.4	10813.6	10391.3	698.418	13611.9	21939.3	18420.1	21450.9	15315.1	2253.64	66580.7	10733.8	117678	17815.6	415746	30235.8	2485.14	12044.5	2995.73	1621.98	5229.04	54034.1	740395	68053.2	892.78	15054.6	3958.75
D286	CRC-DM	665.9	292.8	3889.43	3727.98	4309.54	5355.24	5738.75	1669.07	890.412	1279.98	6210.54	1410.16	12424	3800.99	1740.4	1274.77	199.893	3889.43	3946.82	24284	3056.13	9004.71	4699.65	3608.11	2289.4	10661.3	28451.2	30663.2	41605.5	19688.3	9812.98	43408	6252.96	55311.2	12268.1	73864.3	8489.7	1744.3	9014.91	2392.31	3109.09	7065.66	59008.4	578601	102609	996.94	18363	4419.22
D293	CRC-DM	735.359	2370.97	16730.8	22511.3	5174.5	8398.6	35909.6	2283.74	3017.01	1653.47	7487.08	2164.02	30846.8	25287.1	2832.31	1733.01	812.082	16730.8	6302.66	47207.1	4384.09	17481.7	8489.3	7648.2	1283.84	4666.16	26197.2	30914.2	27167.4	11571.5	6164.03	34162.5	14305.6	52824.1	8501.82	65893.8	6977.5	4849.89	13860.7	3542.32	2538	8312.87	26182.1	580178	78329.7	512.033	20983.6	4657.64
D299	CRC-DM	1028.08	5714.53	45848.7	27461.9	3612.18	8746.89	14968	4595.77	1735.1	2199.51	9516.43	2696.69	36628.1	28517.3	1564.91	2690.1	313.881	45848.7	6366.74	25109	4408.67	33955.8	18452.3	8000.22	579.854	5116.96	7780.39	10081.8	7240.06	7881.63	6888.29	90074.2	27190.2	138077	12923.5	10860.8	999.616	2820.35	12053.3	263.313	1241.4	1609.66	16977.9	110779	44350.1	435.389	5158.99	2063.13
D300	CRC-DM	2423.75	3178.35	29101.1	31001.5	3957.86	8234.42	19445.1	3247.89	2359.15	2737.83	14165.6	4176.51	48124.3	38816.2	3236.65	2388.64	675.97	29101.1	8321.45	52729.5	5723.77	68314.1	31738.8	10368.5	584.26	2592.41	15294.3	20838	11314.1	10202.8	3660.8	8672.15	2990	13634.9	2374.86	102185	8819.26	4826.32	16638.7	524.533	1792.05	4238.98	35859.3	215102	73000.7	507.565	6812.68	2269.26
D301	CRC-DM	8229.87	1587.07	82796.4	6609.21	3323.12	17638.6	7850.11	1308.06	1667.16	1589.65	782.772	3626.24	83664.4	13593.9	2251.01	3143.14	5419.12	82796.4	13125.4	27840.5	4075.75	41677.2	67252.9	645.851	464.152	15690.7	33519.7	59317.6	2297.51	22937.2	12782.7	214.423	238.534	27564.1	1556.07	238631	22195.8	0	1844.55	4621.71	3473.82	9441.48	1799.77	31098.2	26252.6	103.336	1407.96	862.857
D302	CRC-DM	1395.94	10528.7	94654.5	42269.2	6498.53	3704.98	24262.5	3198.72	1531.83	1959.93	7320.82	5046.62	169503	54476.1	3414.67	2419.87	578.91	94654.5	25316.2	84927.7	6454.5	125058	77561.5	17188	922.346	992.664	7236.11	7228.96	9860.88	4589.62	1176.56	28945.5	11879.2	36880.1	7289.59	14841	1325.19	4298.21	20947.4	1684.13	538.491	3029.74	10703.7	30632.9	17847.2	416.595	6211.87	2732.29
D304	CRC-DM	30557	6804.64	231855	11352.8	6096.73	8526.76	4738.04	2816.71	7788.72	3302.34	8355.1	6387.84	8395.3	9658.76	466.626	25009.2	2112.86	231855	29409.8	42943.4	5586.77	83546.5	104831	3137.21	582.288	722.316	2758.62	622.023	719.824	3134.79	6854.08	1756.12	699.546	25745.4	12211.3	13415.9	616.91	2845.95	7330.29	710.304	330.218	1021.78	3362.11	7285.28	4924.6	38.7667	1205.75	0
D305	CRC-DM	103.964	1473.71	8605.44	121.611	258.67	477.615	149.43	45.437	166.994	0	128.108	0	497.163	269.646	198.904	646.952	1065.54	8605.44	2023.02	2176.71	253.69	6611.69	2671.99	3196.67	200.502	575.813	189.936	377.41	826.881	599.145	574.321	478.756	495.334	906.846	272.477	9817.96	502.558	278.164	979.453	353.625	58.5402	282.142	628.37	10900.7	5125.02	33.7712	947.991	194.522
D306	CRC-DM	2550.41	1882.54	14555.3	422.445	882.889	7952.37	21551	1191.13	1383.79	834.104	2369.8	2792.45	29652.6	17232.2	3754.31	1337.18	883.899	14555.3	3425.1	39760.7	4547.71	45202.1	18503.5	11138.2	664.08	1098.18	41232.3	20304.6	666.088	509.497	3068.96	6783.93	3168.17	394.216	3332.05	136354	9321.63	3776.89	13614	6706.76	3047.04	12272	4288.07	906460	120431	331.756	19104.5	6765.84
D308	CRC-DM	78.5961	584.935	1217.16	1133.83	460.084	361.458	177.601	148.479	447.146	539.733	2042.32	1073.18	1768.7	251.651	785.522	256.752	0	1217.16	1811.75	8720.25	273.44	11610.6	5896.75	6141.34	63.8156	4791.45	637.373	1362.83	1087.22	707.256	287.463	585.308	610.394	559.429	238.935	2208.39	162.168	547.354	1900.8	634.269	290.801	812.698	1042.42	12605	9842.08	49.3305	1209.37	645.222
D309	CRC-DM	1215.05	7009.32	51918.3	11293.3	1125.98	2953.95	2162.44	1108	1447.47	1208.89	8546.75	3259.23	6307.42	2105.39	923.829	2633.76	0	51918.3	12320.9	17937.8	1911.4	72371.6	27218.7	8749.91	0	0	4284.93	0	1694.41	0	327.168	5921.81	2282.49	6190.44	2265.42	2991.95	779.7	1245.81	4889.06	0	0	0	854.424	45118.9	10802.6	0	2690.83	663.554
D310	CRC-DM	6964.65	28612.3	268854	90605.8	4793.74	12195.8	22618.1	7120.31	11775.2	9739.93	81290.6	22816	41157.8	28125.4	2490.14	9282.81	2840.01	268854	36374.7	42758.7	8993.3	230938	115602	34620.7	1232.24	2394.5	19326.9	24877.9	7886.17	2412.22	3667.56	68631.6	20857.9	62280.9	12780.7	17094.2	1972.82	6921.24	21553.4	0	1302.41	3334.44	7389.44	59801.7	19206.2	488.75	13587.8	0
D311	CRC-DM	6290.56	5376.68	182204	10175	4974.71	33842.7	12534.7	3549.05	4567.51	21223.4	30210.7	60801.4	65041.8	8637.94	8850.12	5092.96	10531.5	182204	12758	118499	6968.53	159539	104625	0	1779.56	10252.1	8131.49	8065.39	2805.91	3532.71	10185.1	3065.63	1985.42	11367.1	16737.3	323065	25490.6	412.543	5995.35	6393.79	4160.71	10967.3	6313.65	53009.2	25663.4	0	14051.4	626.264
[truncated: 18 more columns]

## Sheet: B
Sample ID	group	ATP5F1A	HSP90AA1	PRDX1	ST13	PROZ	CBR1	PRDX5	BHMT	DCP1B	ANXA4	CYB5A	HSP90AB1	CNDP2	TPM3	PAM	HSPB1	RAD23B	PECAM1	CTSZ	PROCR	LAIR1	MCAM	SERPINA3	PGA4	LAMP2	ENDOD1	CD59	PTGDS	LYVE1	ORM1	RNASE1	MANEL_HUMAN	GSPT2	ARPC5	KRT8	KRT7	CORO1C	NDN	CALD1	S100A9	CD44
1016	HC	422.95	325.125	704.346	1180.24	14104.1	1790.25	4276.7	13375.5	2719.44	1736.41	13453.4	51.3161	2035.4	26985.8	2260.15	15181.3	735.669	14769.4	2704.48	815611	41665	20523.7	381654	1.93026e+06	409888	172090	23108.9	1.11167e+07	62036.8	545685	230632	10455.2	2087.52	847.989	3002.97	962.193	324.07	7576.46	0	37595.2	483809
1049	HC	820.927	20327.9	7179.72	1589.78	9866.62	5633.97	7107.98	20436.2	3402.38	1871.79	15673.3	20089.6	3166.43	35507.8	3361.89	16326.9	3243.81	21922.4	8589.3	872521	484695	19175.2	284580	1.95171e+06	477754	115181	1.34793e+06	1.13626e+07	35912.3	227395	275713	27685	1667.99	2230.47	13182.2	1347.17	2102.61	59664.1	3026.01	111688	585155
NU157	HC	2302.34	246.65	355.094	401.263	5805.71	2105.39	3554.98	4405.52	1004.05	235.261	4176.46	0	1786.27	2648.38	2981.05	8666.38	0	12160.2	2308.32	810067	460.291	3775.27	6124.38	296989	42980.3	102229	224301	8.02876e+06	2174.82	9954.31	153798	29121.5	819.365	288.941	1292.7	514.818	925.351	1811.67	1002.38	4979.85	405661
NU171	HC	0	213.437	1669.07	343.606	2644.44	1179.12	871.978	7355.61	716.638	256.192	8184.1	0	1349.16	34893.4	1211.17	8303.08	894.739	9672.88	11470.7	683924	9370.86	28290	424968	1.5539e+06	533394	59715.7	240824	1.35815e+07	61726.3	252238	5982.01	39695.3	235.855	0	647.448	380.341	1046.94	6727.93	269.993	2189.43	326487
209	HC	177.606	8301.39	3135.19	209.677	2147.86	2250.03	6710.05	27736.9	371.963	1721.64	30948.4	8301.39	4282.33	25063.8	2764.7	61124.9	1181.09	17512.9	1975.63	984728	148183	18486.7	102485	822317	401999	43634.4	437775	2.55476e+06	13262.5	39479.8	79472.1	10350.8	717.85	1014.18	12431.7	1350.2	0	11115.3	61.3851	252990	750078
242	HC	895.84	13077.5	315.42	1121.8	36368.9	3541.57	4720.61	86529.1	2370.92	1031.96	12058.9	11936.6	4695.99	12773.9	894.422	28462.8	1869.83	13224.8	1980.08	1.67995e+06	994.447	23766.8	291554	1.36036e+06	669114	140083	3807.29	6.65478e+06	97202.4	1.13638e+06	328080	14297.9	4151.13	2377.38	6902.99	620.799	1575.7	0	546.733	11638	277749
62	HC	1241.73	4904.76	194.419	265.867	3768.98	2070.53	6095.07	6275.08	637.733	545.079	7300.67	3681.79	0	6040.49	0	9256.88	437.965	7162.17	284.602	214605	1510.32	19726	8020.97	68671	19403.1	81754	12767.1	3.49328e+06	1523.66	3273.89	41002.7	9688.2	241.452	0	1861.15	203.387	587.786	901.874	169.854	3137.97	346312
676	HC	1237.75	990.859	11644.8	1126.05	9727.55	2350.64	7711.29	5883.58	387.64	0	13030.1	0	2182.03	16728.1	1848.09	109726	2987.89	11510.3	9207.5	715325	22221.8	22055.2	121438	586386	382093	26877.8	363233	3.38394e+06	16167.7	38078.1	21805.7	12045.2	1153.6	0	4962.83	1652.99	269.162	14515.5	2536.39	99906.5	555004
977	HC	903.326	393.255	2333.65	1076.71	20403.4	1275.41	5055.46	11677.9	2804.67	745.056	9783.56	51.8808	1938.28	28809.9	1912.94	9252.4	2242.74	11058.5	26295.6	497143	38529.1	19140	546093	851568	233303	116533	744596	1.00965e+07	110760	1.87193e+06	157211	29691.1	1896.56	834.907	3245.87	1078.55	777.875	27044	2728.28	9192.2	251869
D896	HC	0	12991.6	1753.91	902.119	9549.16	4435.59	10024.9	15207	0	2564.54	33790.3	11686.7	2656.35	4323.54	1709.31	60892.2	1468.46	15221.5	0	943834	21502	15286.3	510406	775393	975148	77169.9	7386.4	4.73768e+06	44316.1	438947	399801	12777.2	3939.05	1003.76	12681.8	1935.53	826.767	17364.9	1635.94	297371	807831
D928	HC	1189.64	19097.2	11127.4	1752.47	61546.1	3058.21	7383.61	21586.5	1008.34	1576.53	27281.3	17671.7	2070.64	12674.4	5491.06	95177.1	3465.92	26232	6017.26	1.74724e+06	493485	25750.4	279150	1.32559e+06	661522	85756.9	562742	5.85078e+06	53537.1	349222	318059	13065.2	1018.41	843.721	12594.7	1710.59	1363.74	54410.1	1379.26	482233	676792
NU149	HC	167.614	17741.5	4142.07	1529.17	11006.8	856.036	1506.69	20281.2	1304.75	0	7303.33	17118.2	2666.71	26124.1	1342.47	8376.04	465.775	11776.1	8090.03	57041.7	209025	22844.5	190003	616262	220748	76993.7	35586.9	416930	2039.11	21673.7	167380	59115.1	0	896.279	2535.19	0	312.78	1255.15	561.816	22716.9	462993
Nu150	HC	1160.51	50486.4	5297.78	1637.98	18510	4466.09	3827.27	51713.3	1225.01	932.422	17964.6	49303.9	7131.55	29484.9	1771.67	20589.9	157.251	15226.9	6775.18	283460	327259	20216.8	89998.8	660970	149775	42179	86114.5	128511	289.768	4841.41	96660.1	15445.7	0	1396.44	3416.84	875.167	546.026	1185.75	1934.13	40062.2	629032
NU151	HC	5572.97	4225.44	1143.44	580.638	1989.04	0	1236.41	12771.8	0	1664.71	4392.24	3883.22	0	3009.42	0	11091.2	0	3901.58	696.49	69724.8	168775	64851.5	69439.8	67107.9	8919.29	16038.2	51136.3	168086	342.222	1950.31	432334	3344.68	115.852	249.529	11814.4	704.742	1885.54	500.139	458.534	10862.2	73698
Nu222	HC	1038.48	4502.78	2118.63	2142.05	10029.6	482.732	4747.12	24447.8	0	590.317	25865.2	4247.59	1699.93	8534.37	1692.77	6363.38	0	32959.6	3501.91	151658	250501	19578.8	95962.7	906306	33589.7	82676.5	25598.2	529583	948.469	143877	760177	26944.5	0	56.3508	3845.54	0	624.18	2081.82	123.121	31079	1.01065e+06
Nu243	HC	36.7916	24141.3	13903.3	2970.08	10613.4	6996.36	4748.49	163606	1423.25	1256.84	6012.84	23160.8	8084.36	12438.5	3695.3	12116.9	389.328	22986.8	5849.78	335476	353263	20816.8	144075	703247	164481	73852.2	314244	759173	4860.5	95569.9	782884	14781.4	1383.97	1548.38	3781.8	336.761	511.127	6204.93	959.523	15510.4	852025
Nu253	HC	0	14022.8	5004.04	1166	19306.2	2742.56	4156.16	26004.2	576.426	1405.18	1645.79	13448.5	2401.77	3221.92	1867.56	4418.18	437.778	14995.9	9528.03	67072.1	131402	12708.8	145458	898339	106918	121119	402562	3.25453e+06	6895.79	732408	319061	30592.2	790.633	575.453	4871.97	415.789	487.324	4074.01	0	5697.17	279322
Nu257	HC	0	16145.9	5775.31	1452.11	21164.2	3484.31	5151.81	28061.2	602.664	2092.38	2607.77	15512.3	2804.27	5574.12	2454.97	5108.4	246.217	15476.5	10954.3	112240	160572	13079.6	198409	1.03433e+06	131028	121299	518650	6.81177e+06	7233.88	748625	218196	30238	471.91	771.159	5008.8	239.176	392.917	5346.46	34.7995	6019.16	366774
Nu262	HC	129.681	14987.2	5655.27	1398.74	15373.1	4362.03	5469.71	37800.7	0	633.169	7613.08	14602.5	2104.11	3931.77	2334.09	6607.04	245.255	28429.9	3127.4	314789	402875	12801.2	47700.5	564698	57605.9	55880.3	30663.2	410137	784.123	35534.7	446501	16690.8	214.959	2374.65	3412.87	391.485	802.205	0	391.495	312398	752787
Nu264	HC	704.857	11536.6	13283.9	1367.49	4966.65	2670.42	3681.32	111905	1592.64	591.477	7044.39	11536.6	4934.16	12125.1	2789.55	14709.9	141.427	16890.4	7357.89	278493	292412	21724.6	156655	852139	160877	59482.3	201690	1.57559e+06	4305.22	120773	346060	21479.6	1421.09	1899.76	2006.33	154.763	825.674	7427.04	969.767	96005.2	620548
Nu306	HC	1215.2	37804.5	2077.15	821.573	15377.8	1610.85	7289.19	12289.3	502.633	1148.59	26799	36791.2	2523.26	3532.56	2876.52	14370.5	2678.69	25242.7	4917.33	224738	384286	28420	198877	549401	426203	77133	104267	1.31881e+06	8849.58	492522	156731	27552	0	161.489	6788.58	2991.58	613.657	3803.06	161.489	125689	591200
Nu321	HC	982.64	77098.1	7206.66	2381.23	7687.49	6304.16	6075.2	65646.1	110.666	2459.46	44318	74944	13226.5	15495.2	2606.38	32196.3	2921.21	30671.7	5575.29	213002	373472	38622.5	148598	951816	486426	49175.9	22417.6	231644	568.596	22856.4	180598	46029.5	301.47	223.241	5231.84	715.515	457.929	4978.07	74.4135	11297.5	1.07931e+06
Nu329	HC	777.905	22197.6	3588.86	2931.29	8959.63	4601.05	4764.85	38773.2	274.943	1145.24	18047.9	21860	9484.33	35150.3	2412.66	16212.7	0	29791.2	7893.89	899272	512909	41410.2	135005	911417	194520	89917.7	149898	247697	535.438	7216.67	222673	29508.3	0	142.514	10205	0	1034.21	863.627	280.625	5259.5	595831
Nu350	HC	806.782	103094	7276.85	3534.47	50434	9780.82	7523.18	48809.2	271.187	8824.88	21437.3	100109	19331.1	36386.5	3351.42	26022.7	2962.72	47139.1	6144.65	385594	329657	41934.6	177784	2.66621e+06	241811	143377	297712	1.28581e+06	1100.57	44888.3	504715	73570.8	180.791	0	10119.8	1841.81	908.477	7631.66	716.386	5762.73	572994
NU355	HC	0	10335.3	3449.69	458.1	28528.2	2265.64	1608.16	12571.8	1034.32	1087.84	5568.44	10335.3	3513.27	6091.24	3878.73	4217.14	0	23011.7	23267.7	110883	212155	9866.97	127600	748304	150434	172470	193554	2.32929e+06	11606	1.90585e+06	619659	31584.9	1512.72	1281.44	0	0	462.341	5615.45	0	0	793581
D356	CRC-NM	635.558	24431.7	2837.28	4082.77	6769.79	2274.82	5242.01	225681	370.843	3849.72	8083.1	23438.1	4325.09	22610.2	1270.94	10561.4	1533.33	3507.91	5185.11	171239	12419.3	13832.9	71786.6	411306	27875.4	47549.9	487743	446426	221.912	2986.04	116643	12649.1	375.208	4503.51	634.317	147.242	986.989	3344.72	1523.55	22786.6	297544
D150	CRC-NM	0	12142.5	9931.75	1040.92	14907.2	4427.19	5382.28	89745.8	2898.89	877.391	2947.78	11158.5	2707.28	54259.2	2922.57	7537.33	338.85	910.456	7053.91	45034	27430.8	4066.33	37484.4	111982	2981.2	24585	111278	137410	0	15704.6	19931.9	1616.07	1071.75	1493.6	8028.67	432.585	1298.9	17054.3	4209.43	531.006	23747.7
D159	CRC-NM	3340.12	13795	340.998	1624.45	16108.8	2456.87	1417.29	86922.5	1733.27	1823.53	3142.84	12917.1	19552.3	18398	887.818	35383.2	431.556	0	2415.22	38068.6	23179.3	9391.66	22337.5	72721.2	0	13646.4	15032.1	44363.5	0	0	4837.49	1152.94	0	2668.77	1734.44	0	232.925	371.183	256.165	5515.12	23222.9
D160	CRC-NM	3982.91	36511.8	30725.5	1833.9	9263.75	8975.75	8162.97	202747	3218.9	176.061	1872.51	33012.1	5492.76	58329.1	1231.32	17495	0	581.526	5305.81	7838.15	7889.81	3036.86	21145.2	116273	3928.46	11492.3	25867.3	32711.8	0	3342.43	3542.9	0	1381.36	2343.56	15348.3	745.701	648.21	3619.25	2493.35	2302.56	13664.2
D162	CRC-NM	460.207	9912.12	10477.8	1288.51	33655	7041.03	9909.13	49799.9	4110.94	2087.53	0	9184.1	4158.86	70135.4	3612.1	7954.14	0	2961.81	2017.05	38929.2	45144.5	9388.37	27133.9	143466	2090.66	11620.7	82004.2	62833.8	0	2027.04	13422.2	4672.77	1034.53	2312.59	1723.17	191.544	1615.12	5919.8	14479.4	1334.08	11678.9
D164	CRC-NM	1364.5	27222.3	27559.1	1655.59	29725.3	8349.96	8869.44	452690	3828.57	1827.64	312.164	25736.5	11890.9	49859.6	2358.35	20948.4	1692.71	282.806	1303.04	11829	13732.3	1203.91	16042.5	27346.4	4073.28	4443.93	23688.2	18823	0	2907.56	6500.47	855.626	1559.14	4209.22	15282.1	834.446	2375.27	23793.9	8579.69	0	4460.59
D168	CRC-NM	1241.62	3329.69	0	0	6141.59	1132.19	0	21815	1718.05	0	3978.27	2888.37	1535.87	26515.7	756.56	1148.18	0	3140.59	7616.02	118407	128537	13192.1	99563.2	324335	4017.41	38406.2	175210	243968	0	2159.79	18675.9	1465.32	0	763.13	2146.4	586.952	338.367	938.978	1565.09	2676.76	108010
D175	CRC-NM	466.656	3901.89	0	905.419	30159.4	2667.03	3378.42	88079.7	2723.74	1108.14	481.87	3498.67	4061.58	34187	2646.52	9027.81	0	867.965	957.219	31871.9	3236.54	6914.22	12001.9	38848.2	1673.52	6641.81	27921.8	48312.1	0	2019.66	15871.1	967.79	570.423	942.805	3901.95	552.185	1084.75	3924.05	3061.59	2191	12811.2
D176	CRC-NM	467.593	5026.12	2654.2	615.123	4423.96	2393.4	1115.78	28243.2	0	275.068	9673.75	4565.98	1706.05	7443.42	791.481	9234.62	774.771	0	698.762	895.245	0	0	20883	13079.6	362.36	2383.06	3733.24	4458.94	0	10862	0	0	939.067	504.216	3595.83	0	621.045	2281.52	1404.31	7134.9	1690.12
D177	CRC-NM	1354.62	20699.2	16079.4	6044.48	108146	6860.3	30340.6	94181	3395.12	3695.01	11728.6	18731.7	8641.32	42314.7	14380.7	28520	5861.29	2037.49	1172.69	444623	28676.8	3727.4	68313.4	310892	75098.9	11267.4	10899.8	1.07046e+06	3650.09	16007.2	5066.25	702.291	2163.6	97.3839	34590.1	3262.86	2838.74	66894.7	353.236	11973.3	60603.5
D184	CRC-NM	5127.98	37695.8	2882.37	4106.82	117693	4422.67	17815.3	14120.2	1620.82	4008.83	4518.11	32578.3	9808.06	21705.3	5947.33	88986.1	8679.56	823.064	2186.14	160922	18029.8	3946.39	160284	88107.9	83760.2	15823.6	3280.13	542567	8202.8	21027.8	1939.87	1287.62	0	230.055	25321.1	2451.34	2109.76	32783.4	229.028	7762.29	100855
D205	CRC-NM	7224.3	23423.4	4261.07	1534.08	66331	2980.66	9395.85	4818.23	494.146	2895.91	2107.41	20629.6	1665.34	36839	3116.98	34236.3	2826.49	707.105	2264.06	68735	9186.2	2803.26	50053.1	225037	26101.5	17666.7	2191.93	899992	8432.18	35516.5	2773.58	564.546	211.536	70.7366	87494.5	16632.4	746.701	16392.3	211.873	4039.75	50079.6
D213	CRC-NM	831.596	31732.2	13825.6	9301.85	10197.1	11008.9	15890	105827	4397.84	3738.57	3912.92	30080.4	9846.3	59655.6	3933.34	27648.8	0	2387.23	5793.94	59056.9	13145.3	6867.45	97859	38837.9	3193.33	5050.6	36766.2	35340.8	0	9072.1	31296	3351.16	729.946	3489.82	2854.68	0	3325.51	2600.06	6383.83	1552.05	5776.7
D219	CRC-NM	1828.94	50223.3	35629.1	2775.46	74385.8	2893.57	23230.1	65231.8	2134.18	842.746	878.893	45502.3	6263.67	28562.7	16147.2	53832.9	5788.44	681.53	4576.47	176406	9314.75	5482.08	110829	139386	43968.4	3037.47	4050.58	91006.4	1236.53	2646.88	747.972	186.463	15160.3	5204.1	29731.2	3928.48	264.035	51056.6	550.419	2599.98	59738.1
D237	CRC-NM	974.172	82474.9	21088.1	7300.97	76591.8	6866.48	14467.5	251088	11193.5	5387.26	762.087	77798.9	18385.5	126036	6127.57	76907.2	2768.11	1341.87	7232.69	52797.7	22121.7	13232.1	51461.7	42036.6	7337.99	8793.97	41121.6	20668.4	265.331	6856.73	15822.2	2747.12	2449.83	3715.19	20589.5	1028.4	2781.08	47202	13880.6	636.026	8207.94
D241	CRC-NM	2158.38	45004.5	1926.07	2475.91	22517.2	2300.41	4629.31	84530.6	3943.88	2867.66	1000.31	43980.2	11848.6	44082.8	2321.44	19815.8	305.037	1098.02	3166.6	5223.72	1535.98	1417.79	18703.7	22031.6	8646.93	4954.69	9235.11	56503	918.344	17323.6	5802.19	1000.05	760.872	1744.35	18869.3	1214.06	1883.17	3751.69	2623.57	7304.42	6233.9
D246	CRC-NM	10743.2	67756.6	5414.58	4985.78	8698.71	5323.1	22609.2	104635	454.698	3719.11	833.701	63989.7	16982.7	17685.1	733.888	105602	0	0	3054.89	8304.94	2486.38	1900.02	3064.46	10911.6	0	2570.84	1292.79	23075.6	133.063	2546.3	1808.83	0	1170.08	10316.5	133258	5919.13	0	824.77	774.363	0	5418.86
D267	CRC-NM	1125.9	29752	421.734	1210.93	23393.9	2197.41	3939.24	17649.3	155.357	486.187	3681.9	29266.1	2755	22151	834.384	14802	709.959	418.916	8189.71	17501.6	848.695	3854.49	49864.6	102258	18087.9	10042.4	1430.09	357377	4574.53	66559.6	0	3582.67	892.244	356.521	24966.1	2157.97	1071.34	22211.3	741.589	926.441	34815.7
D269	CRC-NM	16810.3	6888	0	1969.53	59925	8995.58	14830.6	60530.2	3140.22	480.009	3274.24	6888	14703.1	58326.1	7314.53	31526	647.056	380.308	2272.8	27060.9	947.002	2556.19	35912.5	116364	22369.1	4596.06	1855.04	72304.1	1766.67	3047.5	1465.52	574.041	2656.94	3215.25	18804.1	1782.75	1142.96	13194.6	287.942	2853.29	32709.6
D322	CRC-NM	2521.31	3392.55	610.571	922.611	14073.7	1754.44	2712.67	24879.1	0	2147.03	3595.02	3088.86	2898.43	3417.95	0	11791.4	445.401	5343.37	1259.37	116779	73960.3	13192.4	26830.2	69235.3	8644.46	120766	27196.1	658672	0	2427.4	523537	11524.3	199.553	303.897	4425.11	882.269	876.806	3680.23	400.088	3050.68	55719.4
D129	CRC-LNM	2235.58	41564.6	18066.3	1449.53	212637	4274.64	59077.4	63066.4	2083.43	5865.06	2645.44	35838.9	5458.81	60122.7	12052.1	152055	20408.4	4250.06	1509.3	520108	106433	5769.82	122163	284189	73023.5	17695.6	12571	712322	7514.83	4588.58	11576.8	0	781.075	0	14379.7	2095.71	3691.48	161006	0	145895	102958
D182	CRC-LNM	2622.88	148993	8513.66	3909.02	3345.18	9140.62	2677.3	28962.1	1308.41	5887.2	0	142312	13013.3	12772.5	0	74551.3	0	0	4522.33	23080	0	3836.25	112339	0	2683.61	8000.21	6574.69	6584.58	0	0	8646.34	2947.18	877.455	4901.52	10032.8	734.353	875.288	0	0	0	0
D190	CRC-LNM	5044.48	220952	0	4317.77	16198.1	4477.5	11561.1	16052	2607.39	3450.16	4431.73	212329	17628.5	54056.6	649.087	162699	8069.04	230.582	397.931	64056.3	329.416	3468.25	65221.4	104407	207153	12644.1	1228.72	384507	53.6582	21933.4	6751.29	846.683	6511.55	4776.96	155906	30495	2123.69	4570.32	729.134	9407.09	7667.54
D222	CRC-LNM	15658.3	12001.7	1112.84	7113.09	1874.12	4868.65	6370.06	99115.7	1536.01	1809.33	777.712	11201.7	21317.4	22144.3	425.689	48558	1234.58	0	3640.73	8715.12	6199.17	3830.85	18869.6	28772.8	0	9998.17	6767.14	19410.5	0	2195.24	24247.4	618.543	337.64	2314.18	14227.6	667.372	642.293	3985.58	356.27	353.381	2767.25
D223	CRC-LNM	8970.66	54700.3	3670.57	6198.78	31894.4	8848.38	5551.57	204444	4641.9	4677.35	508.508	51048.7	26076.1	41414.2	2190.79	107890	3017.54	0	0	8244.41	941.828	1939.48	5658.41	6814.56	0	5906.16	4443.33	7139.59	0	1030.43	9359.72	871.901	717.799	3562.58	50259.1	5663.78	742.43	3796.27	787.704	3057.77	3194.64
D229	CRC-LNM	2949.53	45577.6	619.085	1507.71	5902.47	2039.93	4639.03	8583.69	1327.34	2744.35	492.229	43635.6	4974.7	35318.6	830.489	21148.3	1847.59	153.78	323.096	1720.3	386.132	1400.06	11659.9	2542.32	28539.2	5612.31	3713.52	17259.3	107.965	5087.04	804.562	482.749	2190.38	714.214	106142	11328.5	1220.75	2835.34	204.31	778.088	1285.37
D236	CRC-LNM	1211.03	65877.8	188.904	1042.14	4073.09	1287.8	776.492	2742.96	1569.48	161.484	416.577	61953	9042.67	31215.2	1945.96	44853.9	2736.72	146.43	2358.73	4442.97	1045.6	0	1541.82	3044.54	9536.66	2707.5	709.909	32055	121.763	1429.53	637.106	233.893	4393.86	600.032	59140.1	7523.87	5579.41	202.456	370.347	375.248	1500.44
D245	CRC-LNM	6643.04	44726.4	5799.83	6211.84	22824	10566	14170.6	86447.5	2736.08	4963.81	892.952	43382.5	13669	44319.7	2296.52	37966.4	0	969.144	4068.38	21550.9	1663.19	7773.96	43847.2	35125.8	716.841	13422.2	0	39248	71.7175	4092.44	7759.53	2488.28	1198.46	2230.27	19506.3	2535.91	2339.68	3688	2361.73	465.656	6648.83
D266	CRC-LNM	1218.8	4626.66	3526.28	2680.8	2440.25	1269.26	2530.97	82738	3876.6	573.386	1057.59	3476.82	3589.26	45717.1	1512.43	38087.2	446.544	712.67	7501.19	16060.3	8756.06	3171.82	18437.8	62640.5	1841.85	7877.7	18097.2	130888	69.0175	10370.6	8841.05	2753.56	522.459	2312.11	14919.6	735.396	3267.19	4970.98	4541.95	619.346	24586.6
D334	CRC-LNM	1666.92	24357.6	15898.2	4307.56	128681	9456.67	11819.7	85823.9	0	9703.4	3038.65	22163.5	17960.2	3695.13	6335.77	67402.4	1960.65	8424.2	3797.29	238539	113172	10710.9	89426.1	485096	16775	56961.8	359447	512408	545.884	19528.2	167620	6175.69	1796.51	4987	5918.87	0	2852.13	20305.6	0	38713.7	339585
D316	CRC-LNM	526.806	13493.7	19307.5	6447.56	17050.4	7968.05	20454.3	158819	1379.75	1532.98	984.921	12440.6	6331.22	12303.9	4912.09	30080.5	1098.88	1973.79	4317.43	135903	9566.65	5131.87	48492.1	94846.2	14981.3	16715.8	34976.7	216313	406.051	42353.2	36229.3	774.17	929.224	4232.64	5022.27	101.534	1173.8	63790.3	324.893	79250.4	66056.1
D337	CRC-LNM	746.902	9857.05	4517.17	4866.46	35108.7	3512.03	3417.6	33099.7	183.678	3210.1	2864.27	8677.76	6593.07	1937.68	5777.9	25271.3	1321.8	2282.04	4690.24	123027	57515.5	9527.19	91737.5	429176	14321.3	38922.3	419497	359343	203.105	1840.1	52105.4	2623.4	604.142	2080.22	4964.3	236.203	1350.39	5996.86	262.776	138440	429607
D345	CRC-LNM	1264.59	16614.4	5387.74	6880.63	72208.6	4081.8	3453.43	90303.6	441.219	3708.57	3172.7	15447	6804.94	2377.01	4561.48	14618.1	1085.72	5243.69	6264.7	523960	195802	11529.8	61388.4	940187	16883.9	37587.9	495452	382564	780.601	2038.63	107494	2728.89	484.871	1346.85	9084.37	201.743	772.061	8363.64	124.888	12720	682717
D357	CRC-DM	4643.52	2687.24	7002.51	4297.33	7082.08	4314.67	4736.88	53511.2	281.511	887.138	8173.56	2476.95	7453.85	17122.5	2284.5	11379.8	1779.84	3476.15	5078.53	165172	34989.1	12545	208066	268002	5574.55	96030.1	228962	885507	161.628	89924.3	60314.2	7840.43	307.634	183.776	15596.7	1360.61	1763.9	19777.3	385.7	43554	77713.8
D127	CRC-DM	283.392	5170.39	30695.9	1661.89	79979.3	21280.2	22555	166241	11971.3	5706.3	1467.06	5170.39	8119.69	158034	7633.37	22605.6	0	3085.94	5744.26	55699.2	112530	8908.13	132446	149635	16696.4	4673.95	69242.3	125182	0	7922.83	8295.8	3041.91	1491.86	9120.67	3504.95	0	3329.86	5257.43	7359.09	4420.41	24490.6
D130	CRC-DM	213.845	18390.8	28678.4	1077.09	39556.4	4463.36	10955.9	60215.7	1581.69	1428.38	776.204	16200.9	2600.77	41279.6	7968.14	19721.6	7931.42	759.026	3506.99	68756.6	40549.4	2967.39	54693.1	384114	34555.1	6726.21	130205	260766	101.258	9998.63	9049.67	2021.99	2645.28	2219.46	4935.68	0	2626.48	62957.9	18979.8	5663.37	16005.2
D139	CRC-DM	319.036	9794.02	5987.39	628.092	17710.1	4359.68	4573.29	140596	1574.61	1518.23	3005.94	9358.39	3367.75	22679	2463.4	10169.7	0	0	11066.6	45714.1	29979.3	3720.46	60035.8	159249	4481.94	9563.33	36193.5	83640.1	0	6040.57	6111.13	1891.51	0	2631.36	666.171	0	148.038	382.748	2016.44	1825.65	13201.3
D154	CRC-DM	567.041	4836.23	8885.04	1942.22	35791.9	3637.46	4006.25	32230	883.463	1506.79	727.772	4052.17	1963.22	11732.6	2235.96	9005.73	1943.06	1411.3	4796.74	116678	22559.5	2697.43	27035.1	183886	26058.7	3431.65	51750.2	192872	99.1271	3481.21	4297.19	647.126	947.308	793.017	7164.59	676.529	767.255	75436	3083.58	2793.48	47790.8
D179	CRC-DM	448.288	28276.2	12300.5	1109.58	38845.7	3406.25	4631.62	49082.7	1181.16	815.043	786.388	25075	4958.42	24565.8	3637.62	15636.8	4546.57	672.274	4447.38	100254	27808.1	4255.02	38212.9	36170.1	40050.2	12029.5	98661.4	610542	197.551	8117.34	12570.7	1312.94	1836.08	1320.11	20495.6	2280.32	841.797	93603	8098.7	4534.53	32897.5
D185	CRC-DM	2347.28	26253.1	31363.6	10589.8	16087	5447.48	12973	125714	2073.43	2159.15	904.8	23507.7	6788.89	34666.3	4857.21	67429.6	5006.49	611.204	2428.36	46846.2	20699.1	2682.78	19630.5	125462	16382.9	9120.06	24225.4	386265	0	4418.12	6320.39	1037.34	2983.7	3694.09	35832.7	2568	3212.66	101523	9695.84	358821	25854.5
D259	CRC-DM	1255.3	30851.9	8144.64	0	22827.1	6481.49	5484.74	28790.4	672.568	3155.11	13497.4	28245.6	8847.6	17814.6	3396.97	38048.6	4014.8	14675.9	6032.38	1.28347e+06	490739	13829.7	168174	840331	600331	58932.4	1.06617e+06	7.9964e+06	18028.6	151099	642967	21527.2	0	0	5885.82	618.895	1601.98	78568.3	0	16593.7	375810
D268	CRC-DM	4335.34	11402.6	26874.1	2126.79	11401.3	6994.45	9463.01	216175	7290.78	1398.86	11954.6	10554.3	10146.9	83468.1	3712.33	122512	591.422	965.277	6800.31	50493	26754.9	4994.23	37292.6	214202	8425.15	10003.3	32722.5	188064	1670.43	15232.5	2116	1937.43	1629.1	4175.71	15939	1061.82	1606.81	5947.99	7358.36	2952.97	32599
D280	CRC-DM	1432.74	123301	54636.4	6377.8	21142.9	9669.24	12130.2	233547	2028.24	2775.58	1363.64	109227	22753.6	47205.6	3742.17	141905	7227.72	465.135	1956.12	79738.8	16085.4	2715.84	38965.6	97102	39117.6	11904.9	28532	699521	566.308	16902.6	13348.7	1299.22	6229.07	7795.38	13165.2	796.249	2506.08	66836.7	12060.5	789.052	18441.3
D281	CRC-DM	2077.37	5837.72	16480.2	3722.77	7012.07	6168.97	23221.8	29713.2	3726.35	1098.42	2630.27	5379.2	3387.08	66484.1	6040.36	42420.9	10391.3	698.418	13611.9	40359.5	36766	2253.64	212808	445981	14529.7	9846.75	54034.1	808448	892.78	40097.9	5393.37	4803.97	4201.75	2696.55	33714.3	2278.14	8473.87	93986.5	17416.5	426.928	14601.7
D286	CRC-DM	665.9	4182.23	3727.98	4309.54	11094	2559.48	8900.68	16225	1740.4	1274.77	199.893	3889.43	3946.82	24284	3056.13	13704.4	3608.11	2289.4	10661.3	59114.4	61293.8	9812.98	117240	82354	10759.2	12567.1	59008.4	681210	996.94	40829.3	12545.5	8226.4	1777.13	2075.67	15018.2	626.277	7711.63	55144.7	4366.53	1678.77	12508.3
D293	CRC-DM	735.359	19101.8	22511.3	5174.5	44308.2	5300.75	11304.6	56133.9	2832.31	1733.01	812.082	16730.8	6302.66	47207.1	4384.09	25971	7648.2	1283.84	4666.16	57111.5	38738.9	6164.03	109794	72871.3	18710.6	14393.2	26182.1	658507	512.033	41509	10162.9	1643.36	6294.05	3472.81	11507	744.341	5665.94	195334	15020.6	1871.2	11880.5
D299	CRC-DM	1028.08	51563.3	27461.9	3612.18	23714.9	6330.87	14412.6	65145.3	1564.91	2690.1	313.881	45848.7	6366.74	25109	4408.67	52408.2	8000.22	579.854	5116.96	17862.2	15121.7	6888.29	268265	11860.4	14873.7	3114.37	16977.9	155129	435.389	13581.4	2573.85	618.234	5173.5	2077.85	18764.1	2750.39	1660.64	66588.9	6230.96	3995.21	5273.46
D300	CRC-DM	2423.75	32279.5	31001.5	3957.86	27679.6	5607.04	21080	86940.5	3236.65	2388.64	675.97	29101.1	8321.45	52729.5	5723.77	100053	10368.5	584.26	2592.41	36132.3	21516.9	3660.8	27671.9	111004	21465	6555.57	35859.3	288103	507.565	20600.2	7520.26	1659.08	6556.43	3690.7	43903.1	2637.93	2190.72	154836	17493.5	2037.92	14850.1
D301	CRC-DM	8229.87	84383.5	6609.21	3323.12	25488.7	2975.22	5998.67	97258.3	2251.01	3143.14	5419.12	82796.4	13125.4	27840.5	4075.75	108930	645.851	464.152	15690.7	92837.2	25234.7	12782.7	29573.1	260827	1844.55	17537	1799.77	57350.7	103.336	3463.48	3844.11	1525.93	1128.09	5224.51	25614.5	2071.89	848.218	1134.11	4670.8	23364.3	25668.7
D302	CRC-DM	1395.94	105183	42269.2	6498.53	27967.5	4730.55	14327.4	223979	3414.67	2419.87	578.91	94654.5	25316.2	84927.7	6454.5	202620	17188	922.346	992.664	14465.1	14450.5	1176.56	84994.4	16166.2	25245.6	5252.36	10703.7	48480.1	416.595	18747.2	13569.9	827.413	11431.9	5200.82	39858.7	2409.01	3835.72	197003	14098	5439.99	11310
D304	CRC-DM	30557	238659	11352.8	6096.73	13264.8	10605.4	18045.3	18054.1	466.626	25009.2	2112.86	231855	29409.8	42943.4	5586.77	188377	3137.21	582.288	722.316	3380.64	3854.62	6854.08	40412.4	14032.8	10176.2	2062.3	3362.11	12209.9	38.7667	1866.97	3862.64	1603.36	342.375	39.7359	201633	24624.1	1680.86	5545.84	113.393	7130.51	2474.94
D305	CRC-DM	103.964	10079.1	121.611	258.67	627.045	212.431	128.108	766.809	198.904	646.952	1065.54	8605.44	2023.02	2176.71	253.69	9283.68	3196.67	200.502	575.813	567.346	1426.03	574.321	2153.41	10320.5	1257.62	694.306	628.37	16025.7	33.7712	4121.15	424.211	318.206	595.683	23.2689	4823.78	805.079	619.971	2075.49	503.851	342.481	779.302
D306	CRC-DM	2550.41	16437.8	422.445	882.889	29503.4	2574.92	5996.36	46884.8	3754.31	1337.18	883.899	14555.3	3425.1	39760.7	4547.71	63705.6	11138.2	664.08	1098.18	61536.9	1175.59	3068.96	13678.4	145675	17390.9	22025.8	4288.07	1.02689e+06	331.756	51740.2	7725.3	1773.08	4571.88	1114.84	37717.8	3442.77	1958.29	230594	6563.89	2280.01	38174.8
D308	CRC-DM	78.5961	1802.09	1133.83	460.084	539.059	595.626	3655.23	2020.35	785.522	256.752	0	1217.16	1811.75	8720.25	273.44	17507.3	6141.34	63.8156	4791.45	2000.2	1794.48	287.463	1994.06	2370.56	2448.15	1737.77	1042.42	22447.1	49.3305	5609.45	1586.78	72.9907	439.852	87.3348	8654.09	262.704	1554.01	4118.55	1798.07	470.428	1621.23
D309	CRC-DM	1215.05	58927.7	11293.3	1125.98	5116.39	2555.47	13014.9	8412.81	923.829	2633.76	0	51918.3	12320.9	17937.8	1911.4	99590.4	8749.91	0	0	4284.93	1694.41	327.168	16660.2	3771.65	6134.87	0	854.424	55921.5	0	9122.28	0	0	4347.68	1132.79	263624	23662.2	5148.55	10565.7	2436.57	753.242	1215.93
D310	CRC-DM	6964.65	297466	90605.8	4793.74	34813.9	18895.5	113846	69283.2	2490.14	9282.81	2840.01	268854	36374.7	42758.7	8993.3	346540	34620.7	1232.24	2394.5	44204.9	10298.4	3667.56	164551	19067	28474.7	4636.86	7389.44	79007.9	488.75	24847.5	3554.65	610.443	24294	13225.5	1.18059e+06	116543	2572.77	109279	7891.5	7687.11	8955.83
D311	CRC-DM	6290.56	187581	10175	4974.71	46377.4	8116.56	112235	73679.7	8850.12	5092.96	10531.5	182204	12758	118499	6968.53	264163	0	1779.56	10252.1	16196.9	6338.62	10185.1	33155.4	348555	6407.9	21521.8	6313.65	78672.7	0	16456.6	0	9551.14	4001.76	12581.2	68460	3462.39	5203.45	5712.98	846.86	2478.21	13790

## Sheet: C
	CRC-NM vs HC	CRC-LNM vs HC	CRC-DM vs HC	CRC diagnosis (CRC all vs HC)
CORO1C	0.671	0.828	0.868	0.79
APRC5	0.724	0.794	0.758	0.754
RAD23B	0.488	0.637	0.816	0.66
Diagnostic panel	0.8	0.948	0.935	0.887

## Sheet: D
	CRC-LNM vs CRC-NM	CRC-DM vs CRC-NM	CRC metastasis (CRC metastasis vs CRC non-metastasis)
CORO1C	0.662	0.725	0.703
RAD23B	0.65	0.783	0.736
GSPT2	0.446	0.71	0.655
NDN	0.488	0.748	0.657
Metastatic panel	0.723	0.827	0.784

## Sheet: Note
Table S2. PRM verification results of the CRC urinary candidate biomarkers.
A and B: PRM validation results of the 41 proteins. (The normalized relative abundance of the proteins in each sample were shown). A: peptide results. B: protein results.
C and D: Summary of performance of the biomarkers for CRC groups discrimination, CRC-diagnosis and CRC-metastasis in RPM validation. C CRC-diagnosis; D: CRC-metastasis.
